# Supplementary material for: Glucocorticoid chronopharmacology promotes glucose metabolism in heart through a cardiomyocyte-autonomous transactivation program
Source: PubMed Central journal article supplement (PMC11601906; doi:10.1172/jci.insight.182599), 2024-11-22

Suppl. Figure 2B

KLF15

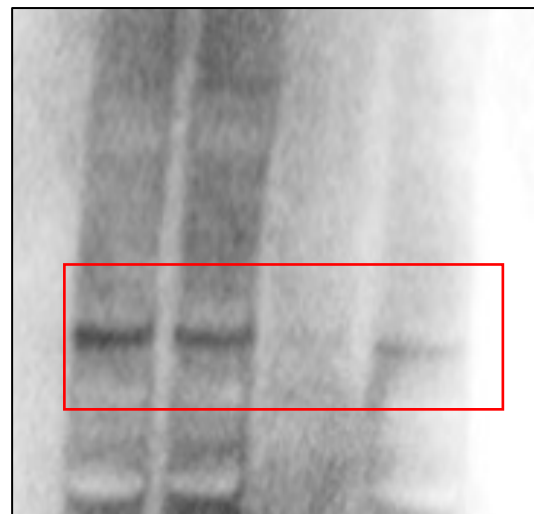

GAPDH

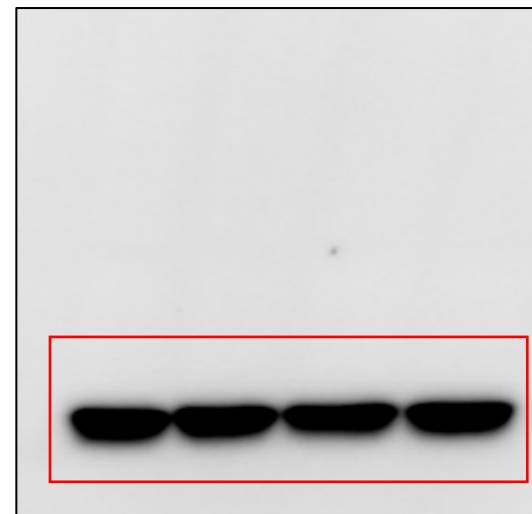

Figure 1C

GR

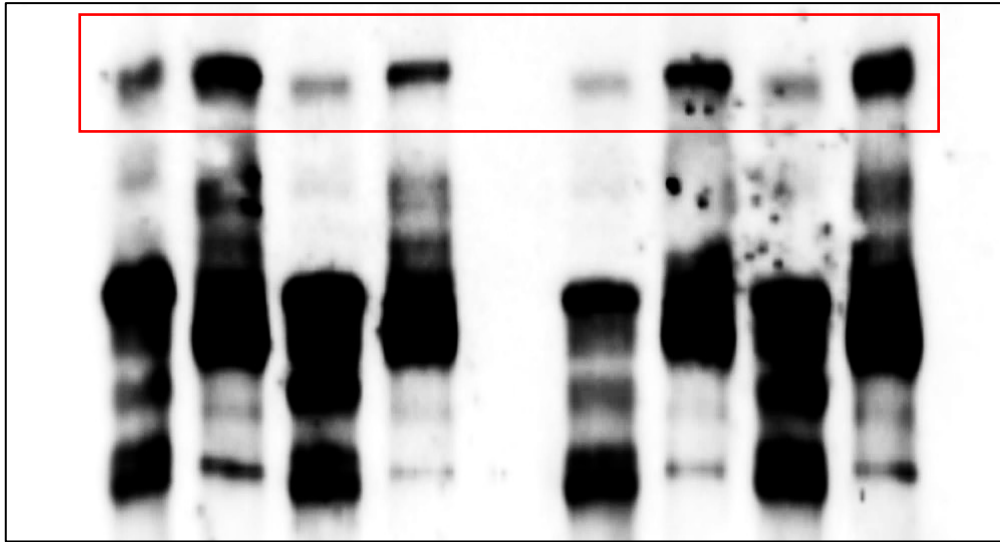

Klf15

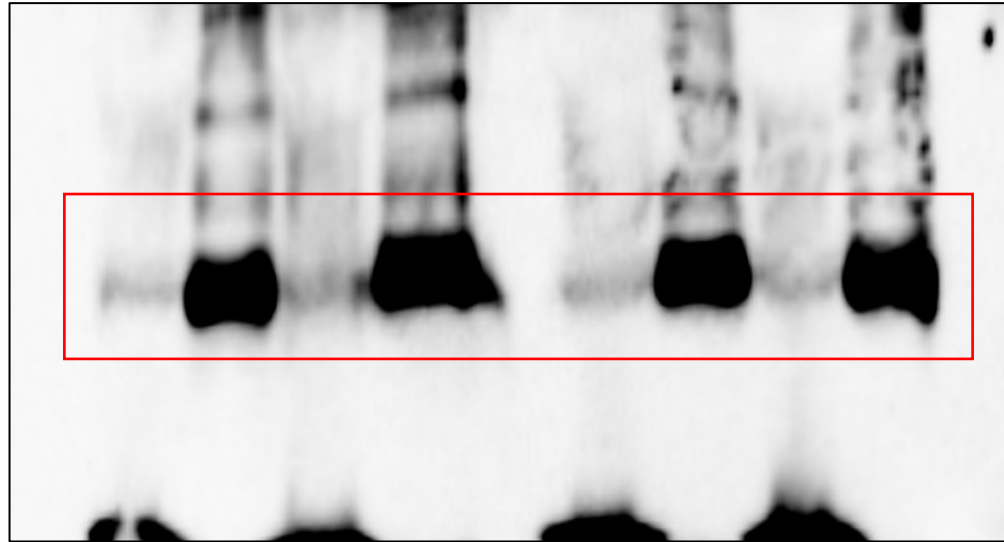

Suppl. Figure 5A

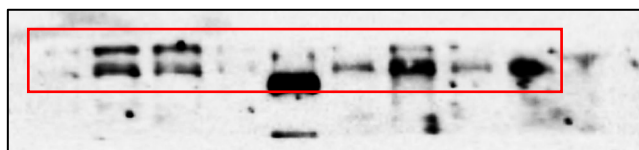

**Klf15**

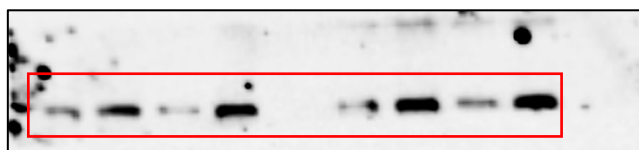

**GR**

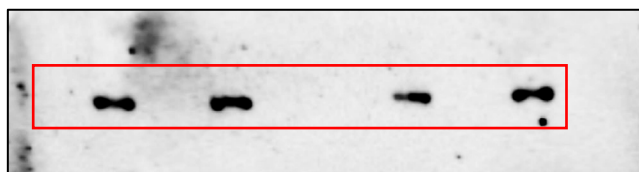

**Gapdh**

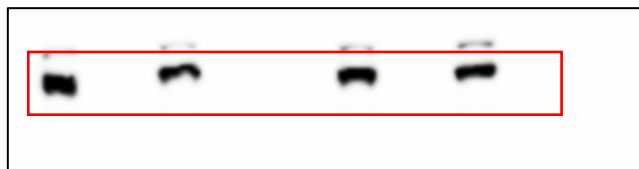

**Histone H3**

Suppl. Figure 5B

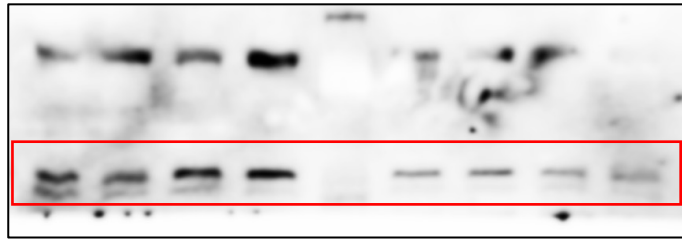

**AdipoR1**

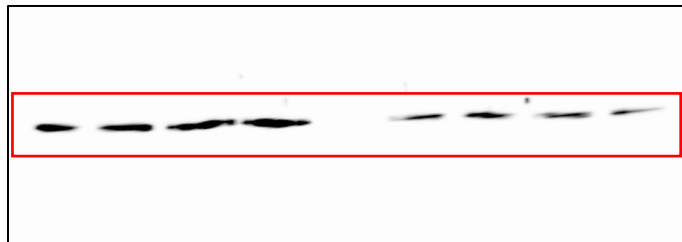

**Mpc1**

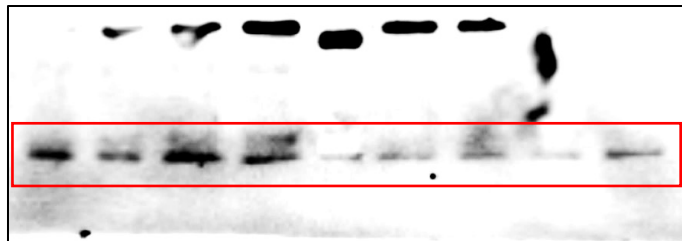

**Mpc2**

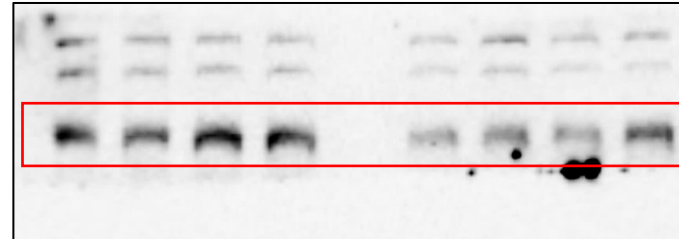

**Glut1**

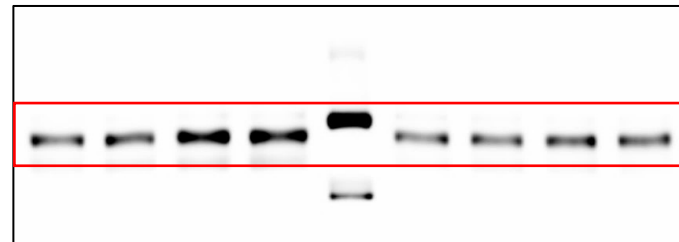

**Glut4**

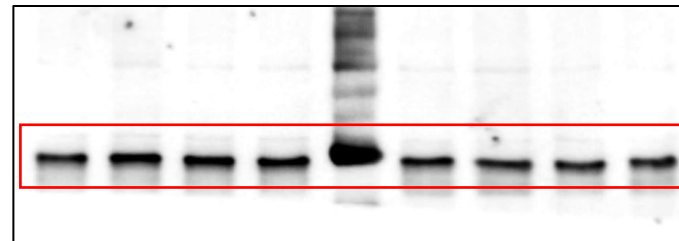

**Gapdh**

Figure 6A

GR

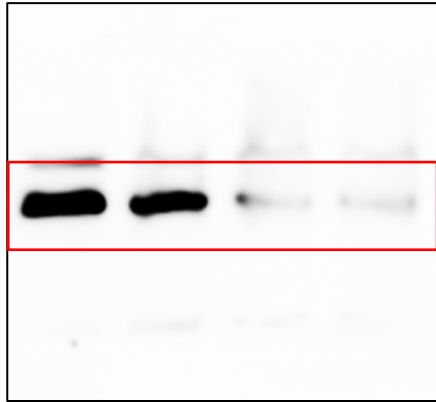

KLF15

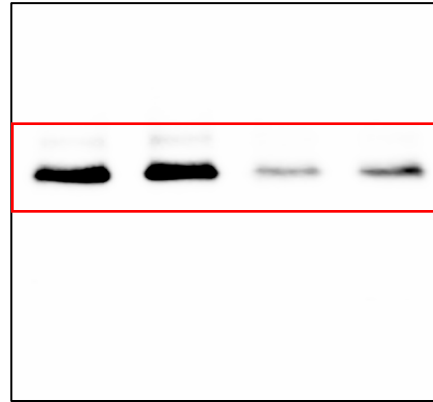

ADIPOR1

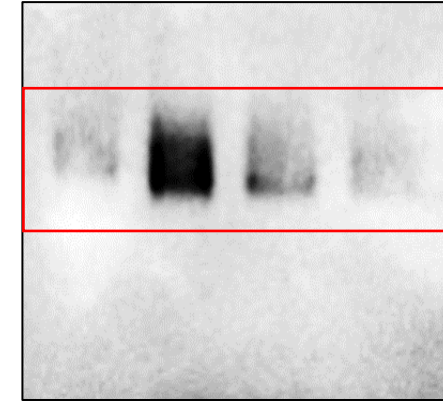

MPC1

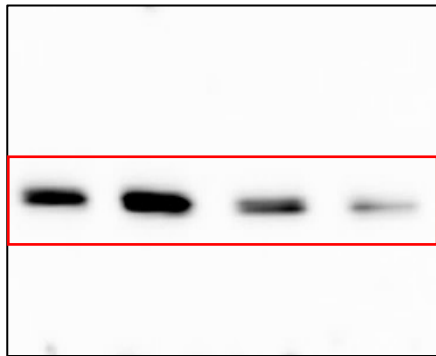

MPC2

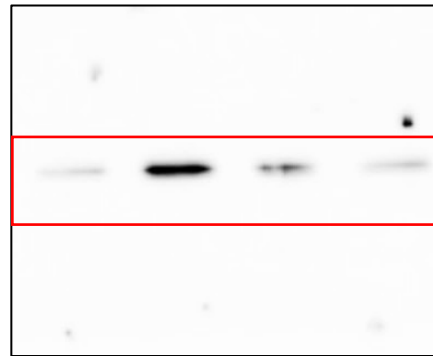

GAPDH

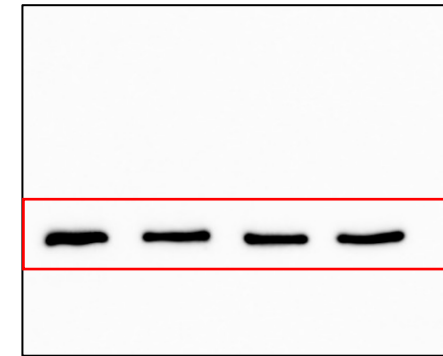

Supplement: jciinsight-9-182599-s064.pdf [file jciinsight-9-182599-s064.pdf]
